# Supplementary material
Source: PubMed Central journal article supplement (PMC1413852)

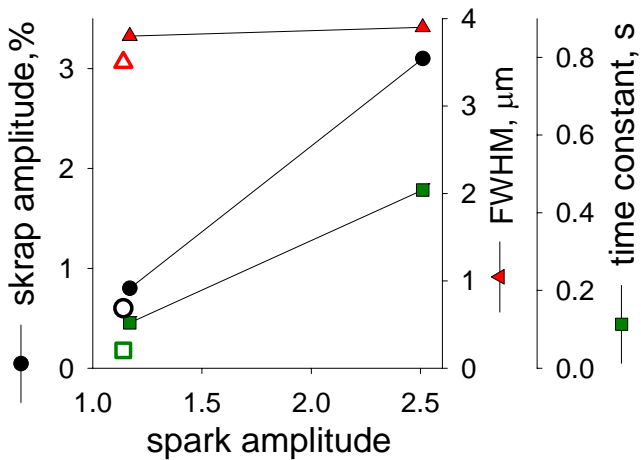

Supplement: pnas_0511252103_1.pdf [file pnas_0511252103_1.pdf]

**A**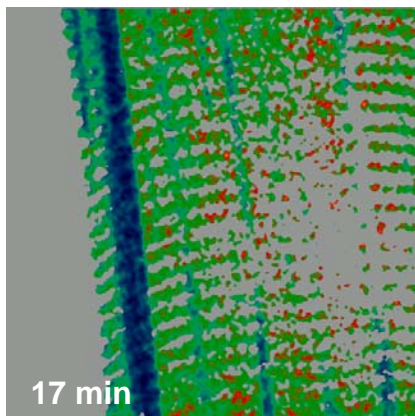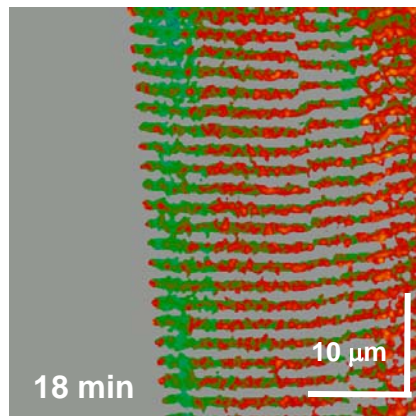**B**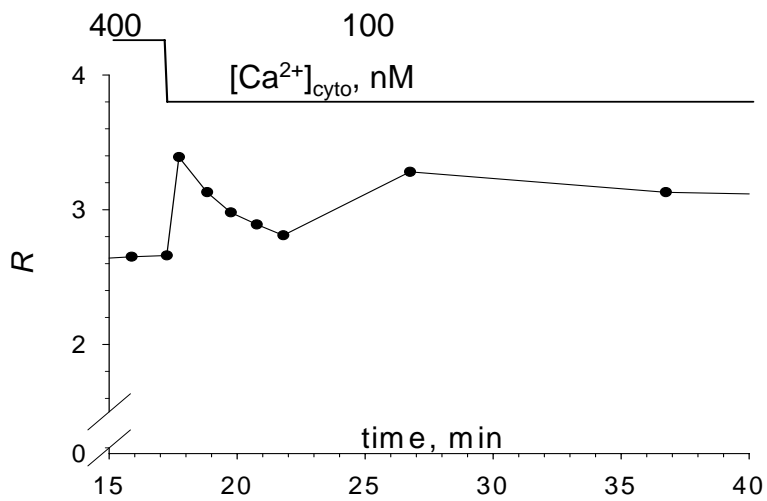

Supplement: pnas_0511252103_2.pdf [file pnas_0511252103_2.pdf]

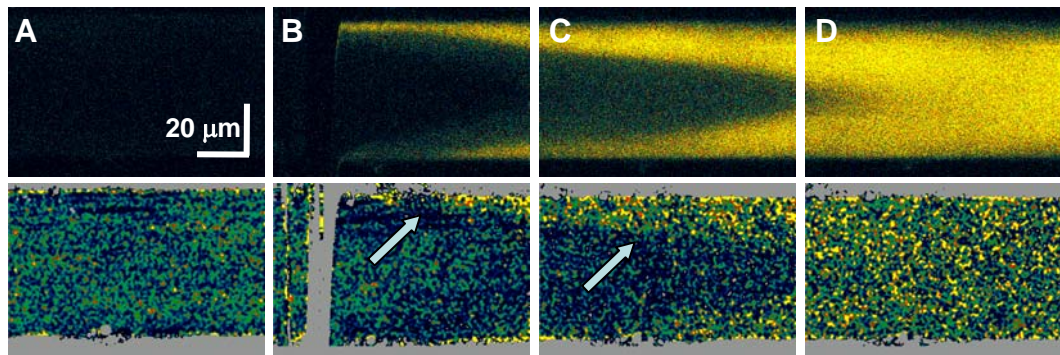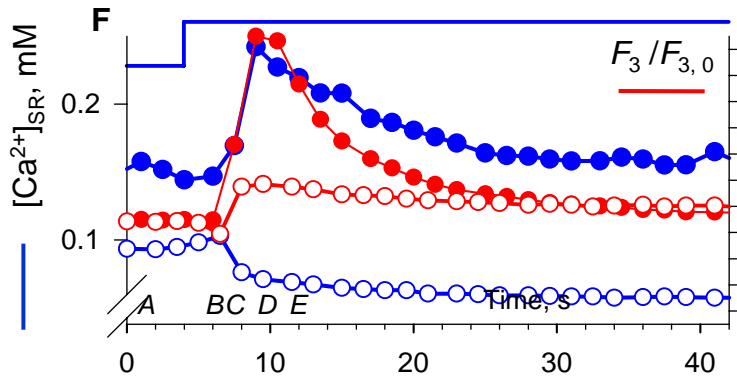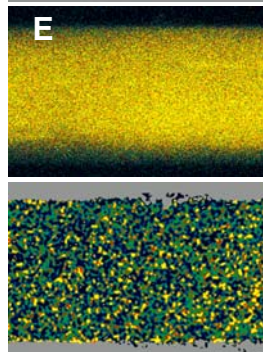

Supplement: pnas_0511252103_3.pdf [file pnas_0511252103_3.pdf]

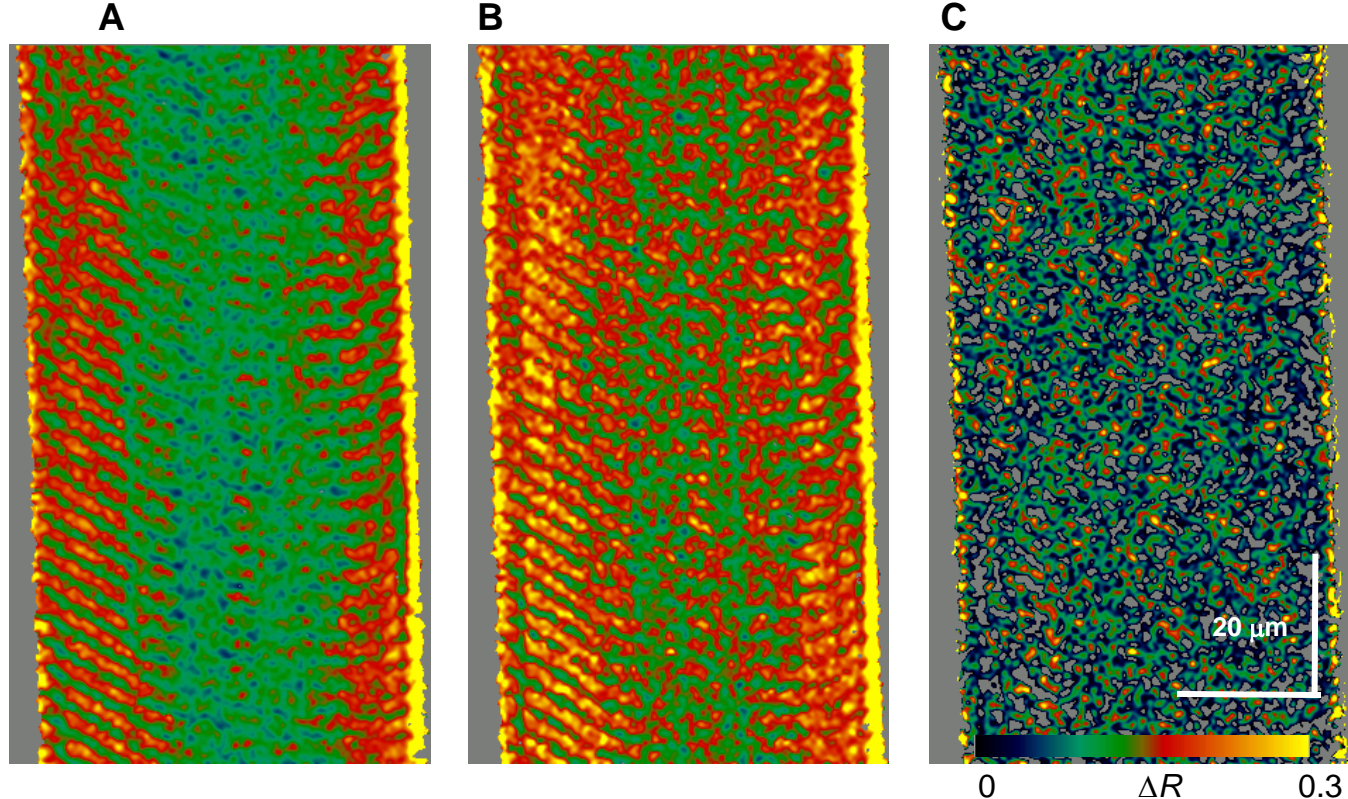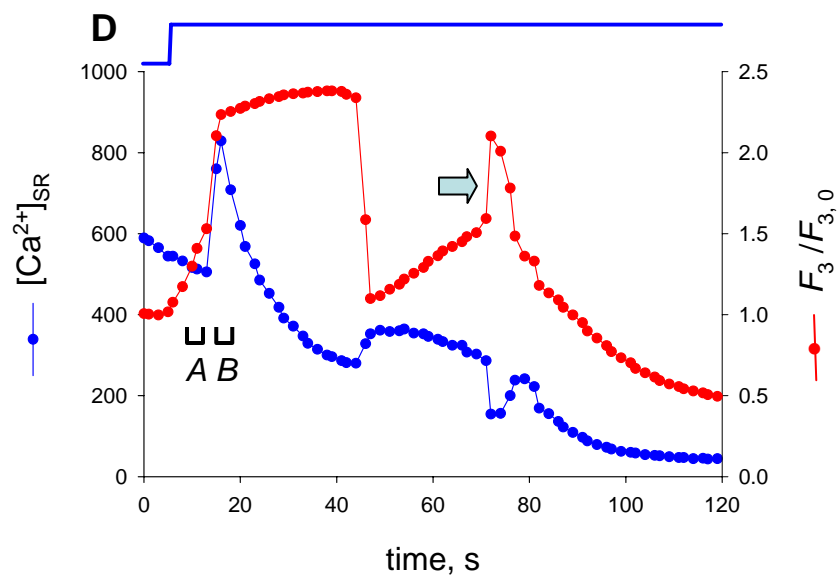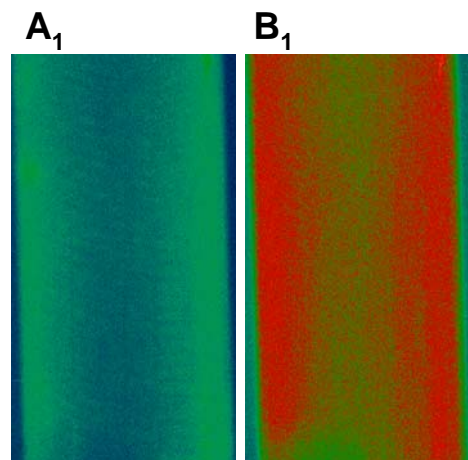

Supplement: pnas_0511252103_4.pdf [file pnas_0511252103_4.pdf]

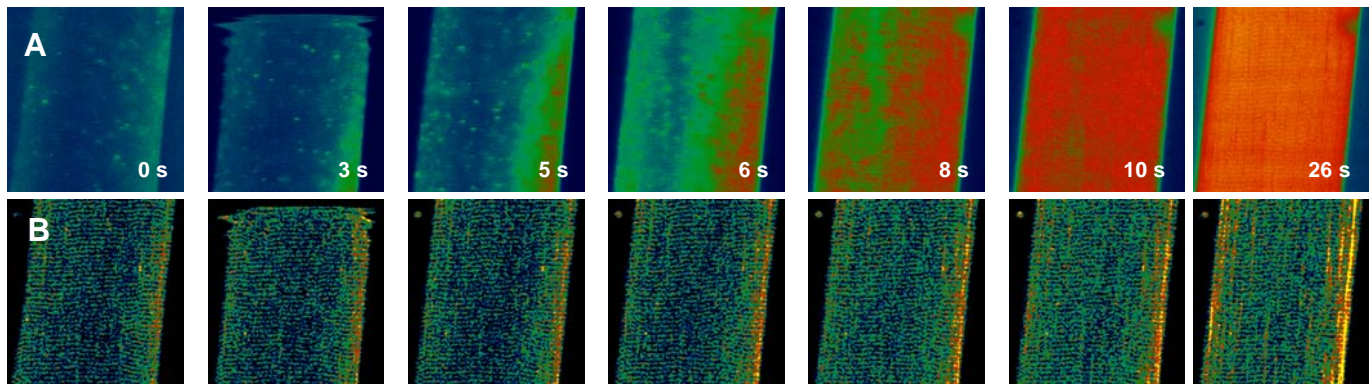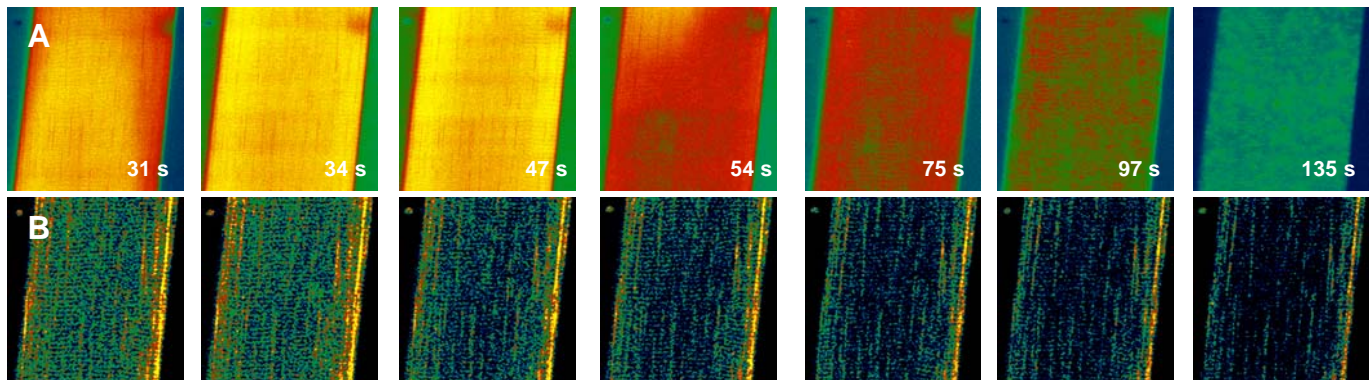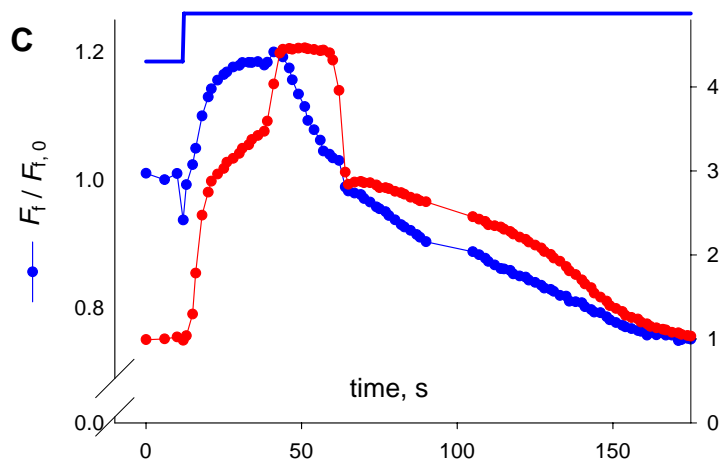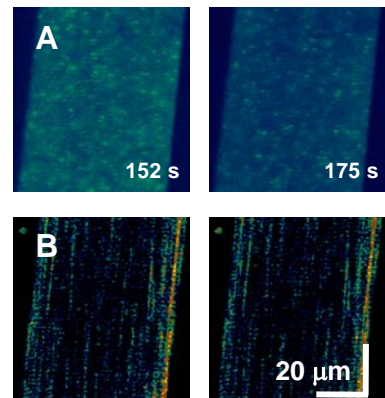

Supplement: pnas_0511252103_5.pdf [file pnas_0511252103_5.pdf]

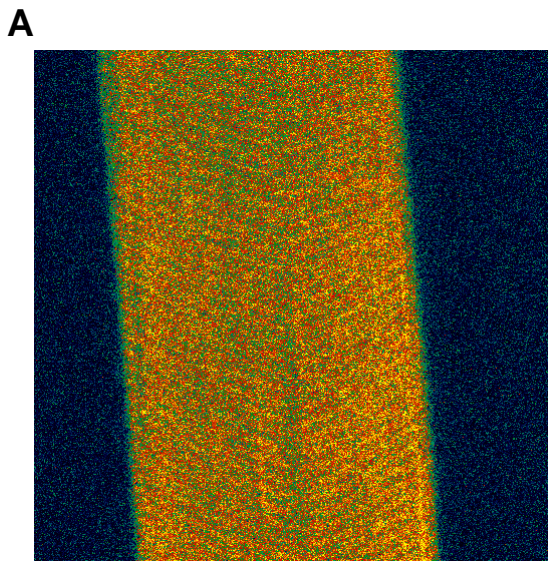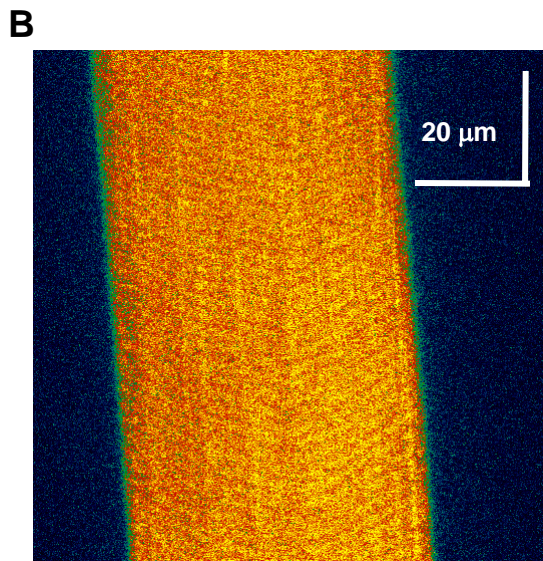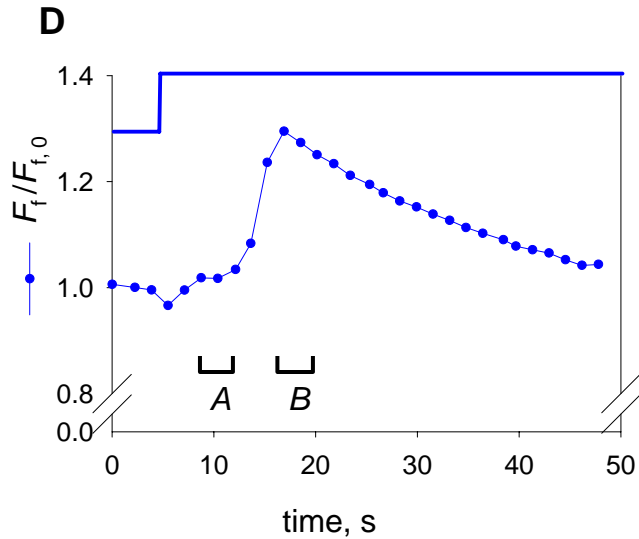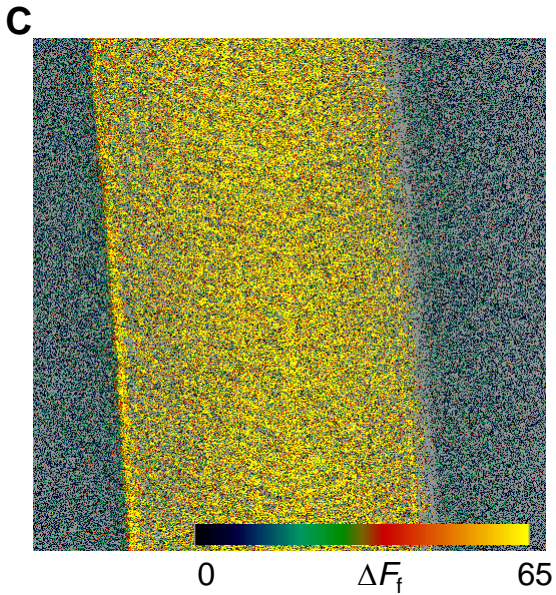

Supplement: pnas_0511252103_6.pdf [file pnas_0511252103_6.pdf]
